# Supplementary material for: Efficacy of Licensed Monoclonal Antibodies and Antiviral Agents against the SARS-CoV-2 Omicron Sub-Lineages BA.1 and BA.2
Source: Preprints.org preprint supplement (doi:10.20944/preprints202205.0381.v1), 2022-05-27

Supplementary Table S1: Lineage classification of strains included in the study, accession number and spike identified mutations.

| Code             | Pango Lineage | WHO     | Spike aa substitutions                                                                                                                                                                                                                                                                                              |
|------------------|---------------|---------|---------------------------------------------------------------------------------------------------------------------------------------------------------------------------------------------------------------------------------------------------------------------------------------------------------------------|
| EPI_ISL_2472896  | B.1           |         | D614G                                                                                                                                                                                                                                                                                                               |
| EPI_ISL_2840619  | B.1.617.2     | Delta   | T19R, E156G, F157del, R158del, S255F, L452R, T478K, D614G, P681R, D950N                                                                                                                                                                                                                                             |
| EPI_ISL_8020894  | BA.1.17       | Omicron | A67V, D614G, D796Y, E484A, F220del, G142D, G219del, G339D, G446S, G496S, H69del, H655Y, ins152KSW, ins214EPE, K417N, L212I, L981F, N211del, N440K, N501Y, N679K, N764K, N856K, N969K, P681H, Q493R, Q498R, Q954H, S221del, S371L, S373P, S375F, S477N, T95I, T478K, T547K, V70del, V143del, Y144del, Y145del, Y505H |
| EPI_ISL_11814364 | BA.2.13       | Omicron | A27S, D405N, D614G, D796Y, E484A, G142D, G339D, Spike H655Y, K417N, L24del, N501Y, N679K, N764K, N969K, P25del, P26del, P681H, Q493R, Q498R, Q954H, R408S, S371F, S373P, S375F, S477N, T19I, T376A, T478K, V213G, Y505H                                                                                             |

Supplementary Table S2: Clinical features of enrolled individuals.

| ID | Sex    | Age (years) | mAbs    | Symptoms                                                                  | Comorbidities                                                                  | Vaccination |
|----|--------|-------------|---------|---------------------------------------------------------------------------|--------------------------------------------------------------------------------|-------------|
| 1  | Male   | 22          | BAM/ETE | Fever, cough, headache                                                    | Myotonic Dystrophy Type 1, hypothyroidism                                      | no          |
| 2  | Male   | 70          | BAM/ETE | Cough, gastrointestinal, dysgeusia/anosmia                                | Hypertension, dyslipidaemia, Type 2 Diabetes                                   | no          |
| 3  | Male   | 62          | BAM/ETE | Headache, arthomyalgia                                                    | Hemosiderosis, previous HBV infection, other respiratory diseases              | no          |
| 4  | Male   | 66          | BAM/ETE | Fever, cough, headache                                                    | Hypertension, dyslipidaemia, other respiratory diseases                        | no          |
| 5  | Male   | 80          | BAM/ETE | Fever                                                                     | Hypertension, cardiopathy, haemato-oncological disease                         | yes         |
| 6  | Female | 80          | BAM/ETE | Fever                                                                     | Hypertension, BPCO, haemato-oncological disease, other respiratory diseases    | yes         |
| 7  | Female | 37          | BAM/ETE | Fever, cough, gastrointestinal, dysgeusia/anosmia, headache, arthomyalgia | BMI > 35                                                                       | no          |
| 8  | Female | 67          | BAM/ETE | Fever, arthomyalgia                                                       | Haemato-oncological disease, dyslipidaemia, latent tuberculosis, dysthyroidism | yes         |
| 9  | Male   | 67          | BAM/ETE | Fever, cough                                                              | Hypertension, cardiopathy, hypothyroidism, dyslipidaemia                       | no          |
| 10 | Female | 53          | BAM/ETE | Fever, cough                                                              | Hypertension, Type 2 Diabetes                                                  | no          |
| 11 | Male   | 40          | BAM/ETE | Dysgeusia/anosmia, headache                                               | Hypertension, dyslipidaemia, hyperuricemia                                     | no          |
| 12 | Female | 52          | BAM/ETE | Fever, cough, gastrointestinal, headache, arthomyalgia                    | Hypertension, BMI > 35                                                         | no          |

|           |        |    |         |                                                         |                                                                                                             |     |
|-----------|--------|----|---------|---------------------------------------------------------|-------------------------------------------------------------------------------------------------------------|-----|
| <b>13</b> | Female | 77 | CAS/IMD | Headache                                                | Hypertension                                                                                                | no  |
| <b>14</b> | Female | 73 | CAS/IMD | Cough                                                   | Hypertension, Type 2 Diabetes, COPD, hypothyroidism                                                         | no  |
| <b>15</b> | Male   | 74 | CAS/IMD | Dyspnoea                                                | Hypertension, dyslipidaemia                                                                                 | no  |
| <b>16</b> | Female | 65 | CAS/IMD | Fever, cough, dyspnoea, headache, arthomyalgia          | Cardiopathy, other respiratory diseases                                                                     | no  |
| <b>17</b> | Female | 77 | CAS/IMD | Cough                                                   | Hypertension, cardiopathy, BMI > 35                                                                         | no  |
| <b>18</b> | Female | 46 | CAS/IMD | None                                                    | Hypertension, dyslipidaemia, BMI > 35                                                                       | no  |
| <b>19</b> | Female | 88 | CAS/IMD | Fever, cough                                            | Hypertension, COPD                                                                                          | no  |
| <b>20</b> | Male   | 62 | CAS/IMD | Fever, cough, headache                                  | Cardiopathy, Type 2 Diabetes, dyslipidaemia                                                                 | no  |
| <b>21</b> | Female | 57 | CAS/IMD | Cough, headache                                         | Hypertension, autoimmune disease, hyperuricemia, BMI = 32                                                   | no  |
| <b>22</b> | Male   | 18 | CAS/IMD | Dysgeusia/anosmia                                       | Cardiopathy                                                                                                 | no  |
| <b>23</b> | Male   | 77 | CAS/IMD | Fever, cough                                            | Hypertension, Chronic Ischemic Cardiomyopathy, cardiomyopathy, Type 2 Diabetes, haemato-oncological disease | yes |
| <b>24</b> | Male   | 75 | CAS/IMD | Fever, cough                                            | Hypertension, haemato-oncological disease                                                                   | yes |
| <b>25</b> | Male   | 69 | CAS/IMD | Fever, dysgeusia/anosmia, arthomyalgia                  | Hypertension, Chronic Ischemic Cardiomyopathy, dyslipidaemia                                                | yes |
| <b>26</b> | Female | 51 | CAS/IMD | Dysgeusia/anosmia, gastrointestinal, cough, fever       | BMI > 35                                                                                                    | no  |
| <b>27</b> | Female | 54 | SOT     | Fever, cough, dysgeusia/anosmia, headache, arthomyalgia | No comorbidity                                                                                              | no  |
| <b>28</b> | Female | 52 | SOT     | Fever, cough                                            | BMI > 35                                                                                                    | no  |
| <b>29</b> | Female | 59 | SOT     | Fever, headache                                         | Ischemic Chronic Cardiopathy, BMI > 35                                                                      | no  |
| <b>30</b> | Male   | 19 | SOT     | Fever, cough, headache, arthomyalgia                    | Other respiratory diseases                                                                                  | no  |
| <b>31</b> | Female | 34 | SOT     | Fever, arthomyalgia                                     | Hemoglobinopathy                                                                                            | no  |
| <b>32</b> | Male   | 56 | SOT     | Cough, gastrointestinal                                 | Immunodeficiency                                                                                            | no  |
| <b>33</b> | Male   | 78 | SOT     | Fever, cough, arthomyalgia                              | Cardiopathy                                                                                                 | no  |
| <b>34</b> | Female | 83 | SOT     | Fever, arthomyalgia                                     | Cardiopathy                                                                                                 | no  |
| <b>35</b> | Female | 69 | SOT     | Cough, headache                                         | Cardiopathy                                                                                                 | no  |
| <b>36</b> | Male   | 78 | SOT     | Fever, cough, headache                                  | Chronic Ischemic Cardiomyopathy                                                                             | no  |
| <b>37</b> | Female | 57 | SOT     | Fever, cough                                            | Chronic Ischemic Cardiomyopathy, immunodeficiency                                                           | no  |
| <b>38</b> | Female | 55 | SOT     | Cough                                                   | Immunodeficiency                                                                                            | no  |
| <b>39</b> | Male   | 52 | SOT     | Fever, arthomyalgia                                     | Immunodeficiency                                                                                            | no  |
| <b>40</b> | Male   | 41 | SOT     | Fever, cough                                            | BMI > 35                                                                                                    | no  |

BAM/ETE = Bamlanivimab plus etesevimab; CAS/IMD = casirivimab plus imdevimab; SOT = sotrovimab; BMI = body mass index; COPD = chronic obstructive pulmonary disease

**Supplementary Figure 1.** Cytotoxicity of the P-gp inhibitor CP-100356 in VERO E6 cells. Cell viability was measured at 72h by CellTiter-Glo 2.0 Luminescent Cell Viability Assay (Promega). The luminescence values obtained from cells treated with P-gp inhibitor or DMSO were measured with the GloMax® Discover Multimode Microplate Reader (Promega) and elaborated with the GraphPad PRISM software version 6.01 (La Jolla, California, USA).

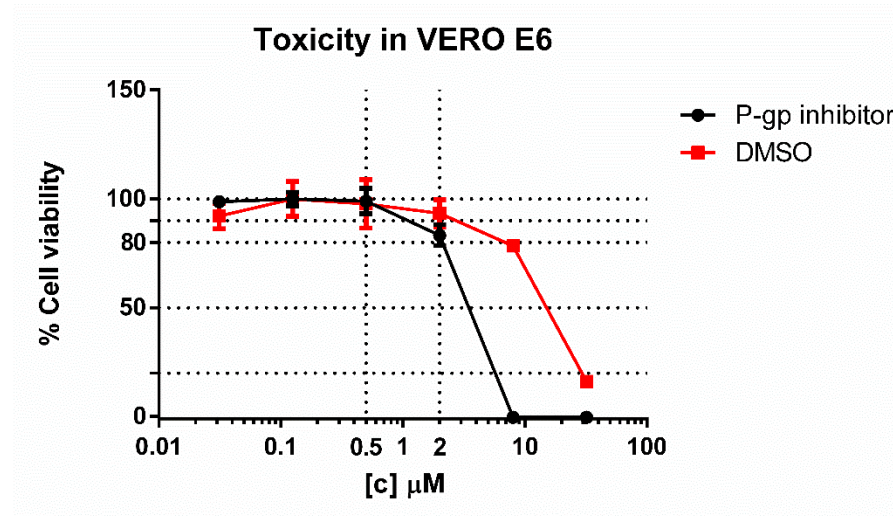

Supplement: Supplementary file 1 [file supplementary]
